# Supplementary material
Source: publisher site journal article supplement (https://www.dovepress.com/article/353660)
Supplement: Supplementary file 1 [file get_supplementary_file.php]

| **Non-urgent** | **Semi-urgent** | **Urgent** |
| --- | --- | --- |
| Conjunctivitis  Pterygium  Pinguecula  Blepharitis  Hordeolum  Chalazion  Floaters  Posterior vitreous detachment  Ocular surface disease/dry eye disease  Refractive error  Cataract  Acephalgic migraines  Recurrent corneal erosion syndrome  Corneal abrasion  Posterior capsule opacification  Subconjunctival hemorrhage | Iritis  VZV ophthalmicus  HSV ophthalmicus  Vitreous hemorrhage  Preseptal cellulitis  Undifferentiated blurry vision  Corneal foreign body  Episcleritis  New onset flashes +/- floaters | Endophthalmitis  Hypopyon  Giant cell arteritis  Papilledema  Paralytic strabismus  Retinal detachment  Retinal tear  Retinal vascular occlusion  Corneal ulcer  Angle closure glaucoma  Neovascular glaucoma/uncontrolled intraocular pressure  Burns of the eyes, eye lids, and peri-ocular tissue  Ocular laceration/penetration  Choroidal hemorrhage or rupture  Acute inflammation of the orbit  Orbital hemorrhage  Uveitis refractory to treatment  Intraocular lens dislocation  Exudative age-related macular degeneration  Hyphema  Scleritis |

**Supplementary Materials**

**Table S1.** Classification of urgency for common ophthalmologic presentations, based on ICD-9-CM diagnosis codes and input from ophthalmologists.

| Question 1: If your virtual assessment by an ophthalmologist advised that an in-person assessment was not necessary, did you still seek care in the emergency department or with another in-person doctor?  a. Yes  b. No  If no, please go to question 2. If yes, proceed to 1.1. |
| --- |
| Question 1.1: Did you go to:  a. Emergency room  b. Ophthalmologist  c. Optometrist  d. Family doctor  e. Another in-person doctor  f. Another online portal |
| Question 1.2: What was the outcome of this in-person assessment?  a. Surgery  b. Diagnosis was changed  c. Treatment was changed  d. Advised to continue present management  e. Other: please describe |
| Question 2: After receiving a virtual assessment by the ophthalmologist, did you experience:  a. Delayed diagnosis  b. Delayed treatment  c. Delayed surgery  d. Inadequate follow up  e. None of the above |
| Question 3: If Prism Eye Institute’s online portal did not exist, where else would you have sought care?  a. Emergency room  b. Another physician  c. Another online portal  d. I would not have sought care elsewhere |
| Question 4: How satisfied were you with the level of care and attention you received while using the online portal?  a. Very satisfied  b. Satisfied  c. Neither satisfied nor dissatisfied  d. Dissatisfied  e. Very dissatisfied |

**Table S2.** Quality assurance questionnaire administered to patients via telephone.
